# Supplementary material
Source: MDPI journal article supplement (https://www.mdpi.com/2079-6412/9/7/447)
Supplement: s1 [file s1]

# Supplementary Materials: Bio-Based Composites with Enhanced Matrix-Reinforcement Interactions from the Polymerization of $\alpha$ -Eleostearic Acid

Amanda Murawski and Rafael L. Quirino \*

Chemistry Department, Georgia Southern University, Statesboro, GA 30458, USA;

\* Correspondence: rquirino@georgiasouthern.edu

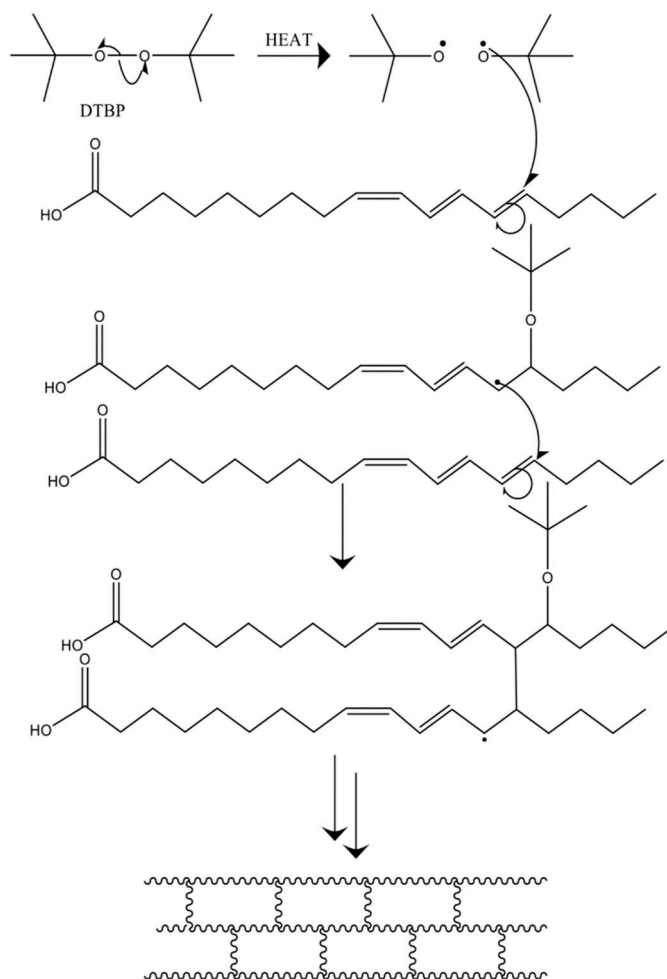

**Figure 1.** Reaction mechanism for the free radical polymerization of  $\alpha$ -eleostearic acid with di-tert butyl peroxide (DTBP) as the free radical initiator.

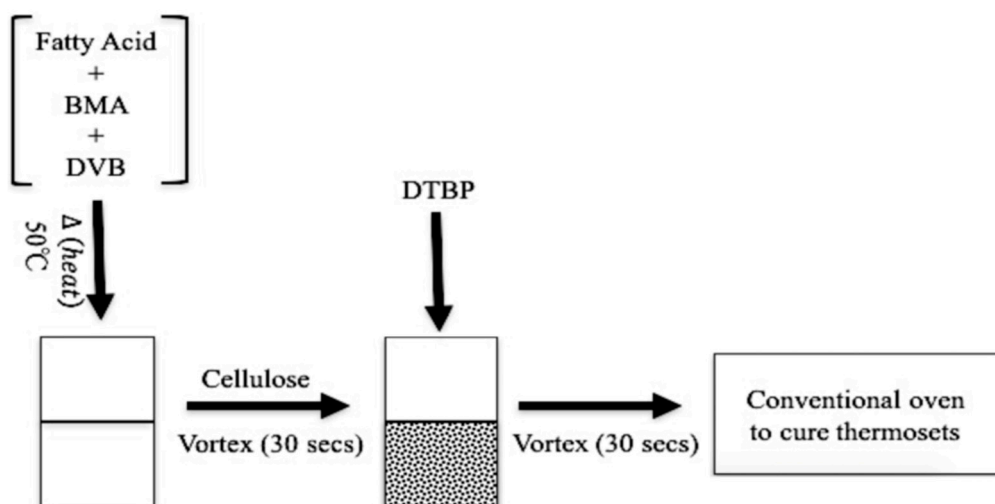

**Figure S2.** General schematic for the preparation of thermosetting composites.

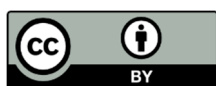

© 2019 by the authors. Licensee MDPI, Basel, Switzerland. This article is an open access article distributed under the terms and conditions of the Creative Commons Attribution (CC BY) license (<http://creativecommons.org/licenses/by/4.0/>).
